# Supplementary material
Source: PubMed Central journal article supplement (PMC2791598)
Supplement: 0907631106_0907631106SI.pdf [file 0907631106_0907631106SI.pdf]

# Supporting Information

Miura et al. 10.1073/pnas.0907631106

```
A. japonica (AB519643) 1 MKSLIFVLVLGTALALDDDKIVGGYECEPYSQPWQASLNAGYHFCGGSLVNNENWV VSAAH 60
A. japonica (AB070720) 1 .R..V.I.L..V.V.....H..... 60

A. japonica (AB519643) 61 CYKSPSSLEVLRLGEHHRVNEGTEQFIRASKVLRNPNYNSWDLSDIMLIKLSKPATLNG 120
A. japonica (AB070720) 61 .R.....GL.....G..H.I.....S 120

A. japonica (AB519643) 121 YVQPVALPTRCAPAGTMCRVTVGWNTMNPVAVSGDKLQCLEIPIILSDNDCSNSYPGMITST 180
A. japonica (AB070720) 121 .....ES..... 180

A. japonica (AB519643) 181 MFCAGYLEGGK DSCQGDSSGGPVV CNGELQGVVSWGYGCAEQNRPGVYNKVCMFSDWLRTT 240
A. japonica (AB070720) 181 .....H....P..... 240

A. japonica (AB519643) 241 MASN 244
A. japonica (AB070720) 241 ...T 244
```

**Fig. S1.** Alignment of eel trypsinogen protein sequences by CLUSTAL W. Active sites of serine proteases, trypsin family, are boxed.

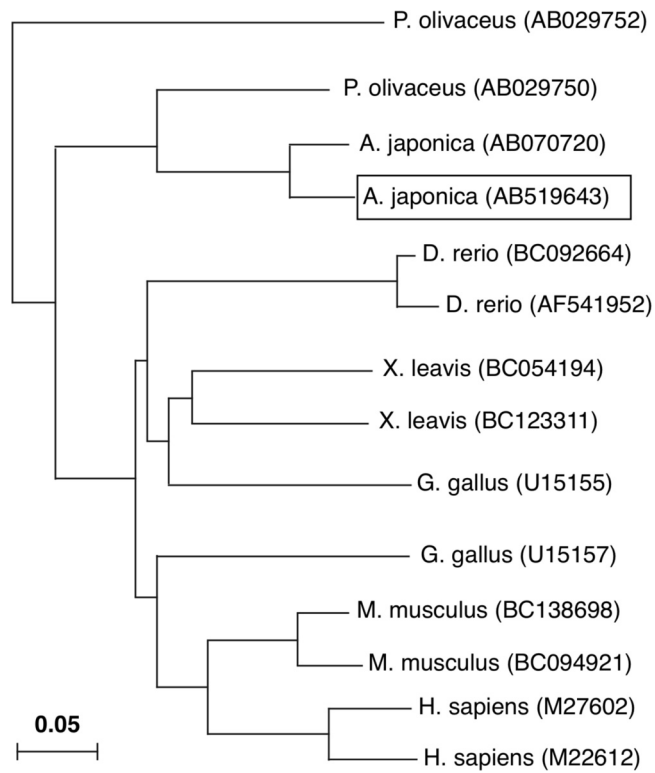

Fig. S2. Phylogenetic tree of the amino acid sequences of trypsinogen constructed with the neighbor-joining method.

27 kDa ▶

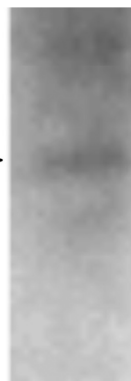

Fig. S3. Western blot analysis of the testes at 12 days post-hCG injection using the antibody against eel trypsinogen.
